# Supplementary material
Source: Springer Nature journal article supplement (https://www.springermedizin.de/resource/supplementary/12906_2010_367_MOESM1_ESM.pdf/9519806)

Spleen (A)

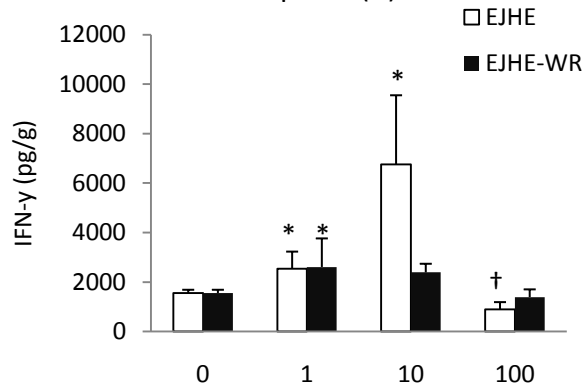

Blood (B)

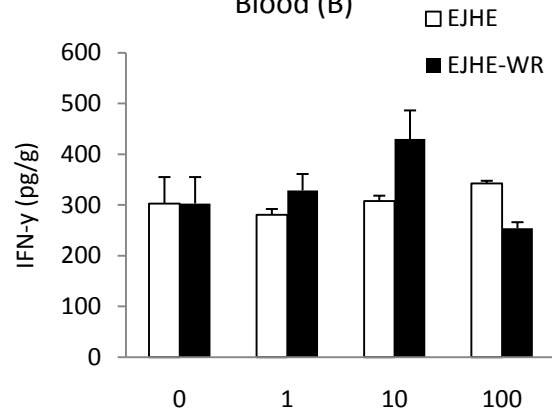

Lungs (C)

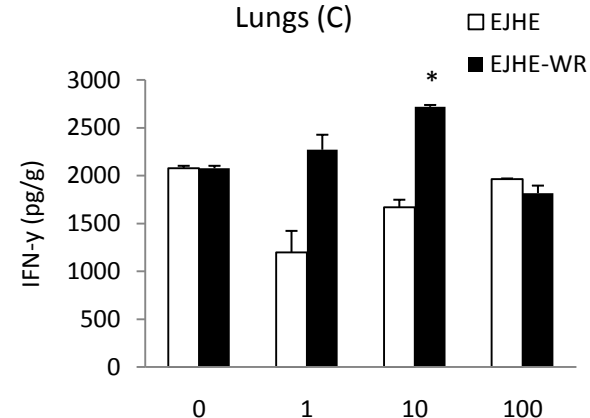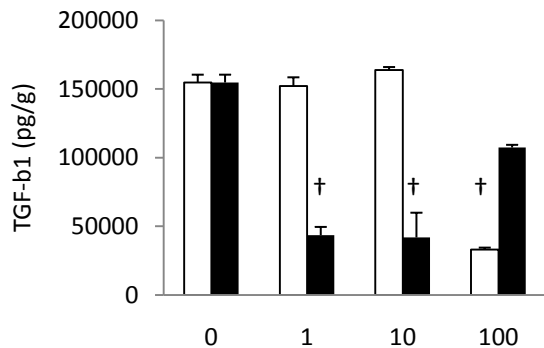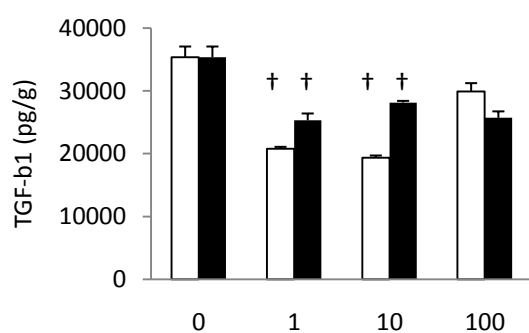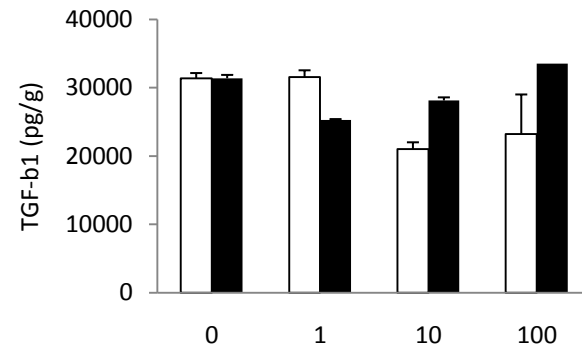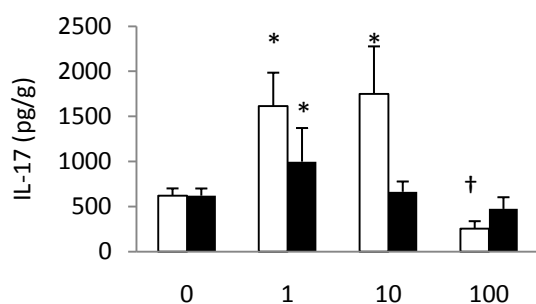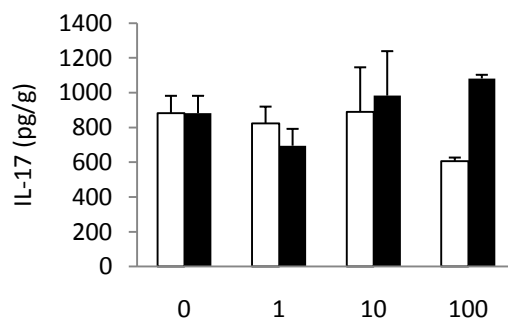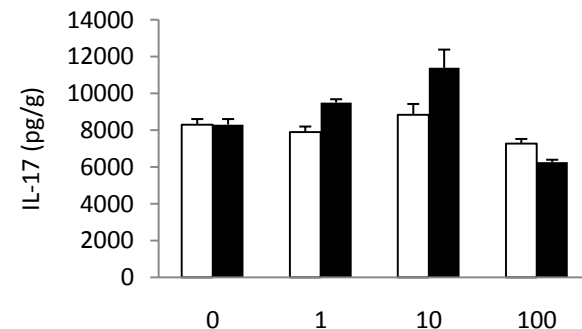

Administered Dose (ug)

Administered Dose (ug)

Administered Dose (ug)

Supplement: MOESM1 [file 9519806]
